# Supplementary material for: The Structured Process to Identify Fit‐For‐Purpose Data: A Data Feasibility Assessment Framework
Source: PubMed Central journal article supplement — Clin Pharmacol Ther. 2021 Dec 1;111(1):122–34. doi: 10.1002/cpt.2466 (PMC9299818; doi:10.1002/cpt.2466), 2021-12-01
Supplement: CPT-111-122-s002.pdf [file CPT-111-122-s002.pdf]

| Study characteristics and considerations          |                                                                                                                                                                                       | Data source #6 | Data source #7 | Data source #11 |
|---------------------------------------------------|---------------------------------------------------------------------------------------------------------------------------------------------------------------------------------------|----------------|----------------|-----------------|
| <b>DESIGN ELEMENTS</b>                            |                                                                                                                                                                                       |                |                |                 |
| <b>Study population</b>                           | <ul style="list-style-type: none"> <li>More than 5 million population (targeted 371 infants with in utero exposure to varenicline)</li> </ul>                                         | 5              | 5              | 5               |
| <b>Treatment/exposure and comparator group(s)</b> | <ul style="list-style-type: none"> <li>Maternal prescription data linked with birth data</li> <li>In utero exposure to maternal smoking status</li> </ul>                             | 5              | 5              | 4               |
| <b>Primary outcomes</b>                           | <ul style="list-style-type: none"> <li>Mother — infant linkage</li> <li>Birth data linked to infant inpatient/outpatient diagnosis data</li> </ul>                                    | 5              | 5              | 4               |
| <b>Secondary outcomes</b>                         | <ul style="list-style-type: none"> <li>Birth data linked to infant inpatient/outpatient diagnosis data</li> <li>Birth data linked to infant causes of death data</li> </ul>           | 5              | 5              | 4               |
| <b>Length of follow-up and data recency</b>       | <ul style="list-style-type: none"> <li>1 year after birth minimum</li> </ul>                                                                                                          | 5              | 5              | 5               |
| <b>Confounding variables</b>                      | <ul style="list-style-type: none"> <li>Pregnancy data linked to maternal prescription data</li> <li>Pregnancy data linked to maternal inpatient/ outpatient diagnosis data</li> </ul> | 5              | 5              | 4               |
| <b>DATA ACCESS CONSIDERATIONS</b>                 |                                                                                                                                                                                       |                |                |                 |
| <b>Timeline</b>                                   | <ul style="list-style-type: none"> <li>Time to fully executed contract</li> <li>Time to data access</li> <li>Time to analyze</li> </ul>                                               | Moderate       | Fast           | Moderate        |
| <b>Contracting logistics</b>                      | <ul style="list-style-type: none"> <li>Cost</li> </ul>                                                                                                                                | Medium         | Medium         | Low             |
| <b>FINAL DATA SOURCE SELECTION</b>                |                                                                                                                                                                                       | ✓              | ✓              |                 |

#### LEGEND

|   |                                                                                    |
|---|------------------------------------------------------------------------------------|
| 5 | = Many/nearly all data requirements met                                            |
| 4 | = Several data requirements met                                                    |
| 3 | = Likely that several data requirements are met but requires further investigation |
| 2 | = Some data requirements met or unable to assess at this time                      |
| 1 | = Data requirements not met                                                        |

**Figure S2.**  
**Case Example 2: SPIFD Step 3 heatmap retrospectively applied to varenicline pregnancy study**
